# Supplementary material for: Implementing the Clean Clinic Approach Improves Water, Sanitation, and Hygiene Quality in Health Facilities in the Western Highlands of Guatemala
Source: Glob Health Sci Pract. 2020 Jun 30;8(2):256–69. doi: 10.9745/GHSP-D-19-00413 (PMC7326526; doi:10.9745/GHSP-D-19-00413)
Supplement: 19-00413-Lopez-Supplement_1.xlsx [file 19-00413-Lopez-Supplement_1.xlsx]

## Sheet: Supplement 1-ScoreCard-Spanish
	Fecha				/ /
	Nombre del entrevistador
	Cargo del entevistador
	Departamento
	Municipio
	Tipo de Servicio:				CAP ( ) CAIMI ( ) Hospital ( )
	Personal entrevistado
	No.	NOMBRE						CARGO			AREA DE LA QUE INFORMA
	1
	2
	3
	4
	FORMULARIO No. 1 ESTANDAR DE AGUA
	NO.	CRITERIO						EME	SP	SC	EME	SP	SC
	1.1	El establecimiento de salud cuenta con una fuente de agua mejorada							NA		5	NA
	1.2	La fuente de agua está ubicada en el establecimiento de salud							NA		1	NA
	1.3	El sistema de agua está funcionando en el momento de la visita							NA		8	NA
	1.4	La fuente de agua es permanente							NA		2	NA
	1.5	El agua es potable							NA		3	NA
	1.6	El agua potable se almacena de manera segura							NA		2	NA
	1.7	Cuenta el establecimiento con planta eléctrica funcionando							NA		1	NA
	1.8	La salas de parto y del neonato tiene agua disponible para diversos usos						NA			NA	7	7
	1.9	Las salas de parto y del neonato tiene agua potable						NA			NA	5	5
	TOTAL										22	12	12	46
	FORMULARIO No. 2 ESTANDAR DE SANITARIOS
	NO.	CRITERIO						EME	SP	SC	EME	SP	SC
	2.1	La sala tiene un sanitario mejorado y funciona									1	3	3
	2.2	Los sanitarios están separados y señalizados para hombres / mujeres							NA	NA	1	NA	NA
	2.3	El sanitario es accesible para personas con problemas de movilidad y capacidades especiales							NA		2	NA	2
	2.4	Los sanitarios están limpios							NA		2	NA	2
	2.5	Los sanitarios brindan privacidad							NA		1	NA	2
	TOTAL										7	3	9	19
	FORMULARIO No. 3 ESTANDAR DE HIGIENE
	NO.	CRITERIO						EME	SP	SC	EME	SP	SC
	3.1	Las camas tienen cubiertas de materiales lavables									1	1	1
	3.2	Cada cama tiene un máximo de un paciente (o madre e hijo)									2.5	1.5	1.5
	3.3	Separación de las camas por una distancia de 2.5 metros desde el centro de una cama a la otra									0.5	0.5	0.5
	3.4	Ambiente para baño (ducha) disponible en la sala						NA			NA	3	3
	3.5	El ambiente de baño (ducha) tiene agua disponible						NA			NA	3	3
	3.6	El ambiente de baño (ducha) está en condiciones para su uso inmediato y sin obstáculos						NA			NA	1	1
	3.7	El ambiente de baño (ducha) tiene drenaje hacia la reposadera						NA			NA	2	2
	3.8	El área de baño incluye puertas, tabiques o pantallas para que la paciente tenga privacidad						NA			NA	1	1
	3.9	Los lavamanos tienen agua.						NA			NA	8	8
	3.10	Los lavamanos con jabón liquido (o desinfectante a base de alcohol).						NA			NA	8	8
	3.11	Los lavamanos con papel desechable para el secado.						NA			NA	8	8
	3.12	El ambiente de baño (ducha) tiene puerta de 80 cm de ancho y espacio para que un acompañante brinde asistencia si es necesario.						NA			NA	2	2
	3.13	El camino hacia la ducha es accesible para personas con movilidad limitada y capacidades especiales						NA			NA	1	1
	TOTAL										4	40	40	84
	FORMULARIO No. 4 ESTANDAR DE ESTERILIZACION
	NO.	CRITERIO						EME	SP	SC	EME	SP	SC
	4.1	Tijeras estériles están disponibles en la sala						NA			NA	5	2
	4.2	Clamps / cintas de castilla estériles están disponibles en la sala						NA			NA	5	2
	4.3	Guantes estériles disponibles en la sala									2	2	2
	4.4	Gazas estériles disponibles en la sala						NA			NA	2	2
	4.5	Autoclave en buenas condiciones y funcionamiento en central de equipos						3	NA	NA	3	NA	NA
	4.6	La máscarilla esterilizada disponible en la sala						NA			NA	2	2
	4.7	La bata clínica esterilizada disponible en la sala						NA			NA	2	2
	TOTAL										5	18	12	35
	FORMULARIO No. 5 ESTANDAR DE MANEJO DE RESIDUOS
	NO.	CRITERIO						EME	SP	SC	EME	SP	SC
	5.1	Los desechos se segregan en tres bolsas (roja, blanca y negra) con especificacines de acuerdo a la normativa									2	3	2
	5.2	Los contenedores están claramente etiquetados para observar el tipo de receptáculo de desechos									2	2	2
	5.3	Hay un contenedor rigido de color rojo usado para desechos cortopunzantes									2	3	2
	5.4	Las placentas se disponen adecuadamente en bolsas rojas.						NA			NA	2	2
	5.5	Los pañales con heces de bebe se depositan en las bolsas rojas						NA	NA		NA	NA	2
	5.6	Guantes ( de acuerdo a normativa) están disponibles para cuando se maneja y transporta desechos sólidos hospitalarios.									2	2	2
	5.7	Máscaras (de acuerdo a normativa) están disponibles para cuando se maneja y transporta desechos sólidos hospitalarios.									2	2	2
	5.8	Gafas disponibles para cuando se maneja y transporta desechos sólidos hospitalarios.									2	2	2
	5.9	Botas de hule disponibles para cuando se maneja y transporta desechos sólidos hospitalarios.									2	2	2
	5.10	El uso de equipo de protección es utilizado por el personal que maneja los desechos sólidos hospitalarios									2	2	2
	5.11	Los residuos se transportan y almacenan de forma segura y correcta por separado hacia el centro de acopio del establecimiento del establecimiento de salud.							NA	NA	4	NA	NA
	TOTAL										20	20	20	60
	FORMULARIO No. 6 ESTANDAR DE LIMPIEZA
	NO.	CRITERIO						EME	SP	SC	EME	SP	SC
	6.1	La sala tiene un cronograma de limpieza por escrito que se actualiza y utiliza de forma clara.									1	1	1
	6.2	La sala tiene un resumen escrito de las funciones y responsabilidades del personal para la limpieza									1	1	1
	6.3	Las superficies de trabajo y las camas están visiblemente limpias									2	2	1
	6.4	La solución de cloro disponible para utilizarse en la instalación (0.5mg/lt)									2	2	1
	6.5	Trapeadores limpios están disponibles							NA		1	NA	0.5
	6.6	Detergente está disponible							NA		1	NA	0.5
	6.7	La solución de cloro al 0.5% se utiliza en la sala							NA		1	NA	0.5
	6.8	Escobas en buenas condiciones está disponible							NA		1	NA	0.5
	6.9	Hay lavadoras disponibles y suficientes para lavar la ropa de cama de cada paciente.							NA	NA	1	NA	NA
	TOTAL										11	6	6	23
	FORMULARIO No. 7 ESTANDAR DE ADMINISTRACION
	NO.	CRITERIO						EME	SP	RN	EME	SP	RN
	7.1	El personal de limpieza ha recibido como mínimo 2 capacitaciónes sobre procedimientos de limpieza en los últimos 12 meses.							NA	NA	2	NA	NA
	7.2	El personal de sala de partos ha recibido capacitación sobre procedimientos de limpieza en los últimos 12 meses							NA	NA	2	NA	NA
	7.3	En salas generales se colocan letreros que recuerden medidas de higiene.							NA	NA	2	NA	NA
	7.4	El establecimiento tiene un plan anual de mejora que se implementa todo el tiempo.							NA	NA	2	NA	NA
	7.5	Existe un protocolo/guias de procedimientos actualizado que describe el procedimiento que se utiliza para el agua potable							NA	NA	2	NA	NA
	7.6	Existe un plan de gestión de riesgo para garantizar la gestión y manejo del agua							NA	NA	2	NA	NA
	7.7	Existe un plan de gestión de riesgo para garantizar los servicios de saneamiento							NA	NA	2	NA	NA
	7.8	Existen y se aplican los protocolos/guias de procedimientos de manipulación, manejo seguro e inocuidad de los alimentos							NA	NA	2	NA	NA
	7.9	Existe un protocolo que describe con claridad un programa para la disposición y tratamiento de los desechos sólidos hospitalarios							NA	NA	2	NA	NA
	7.10	Existen protocolos/guias de procedimientos de limpieza y describen claramente los procedimientos como se indica en la guía para la prevención y control de infecciones intrahospitalarias del Viceministerio de Hospitales.							NA	NA	2	NA	NA
	7.11	El protocolo de impieza incluye pasos claros para limpiar una cama y cuna (si aplica)							NA	NA	2	NA	NA
	7.12	El protocolo para la instalación incluye pasos claros para para limpiar un piso							NA	NA	2	NA	NA
	7.13	El protocolo para la instalación incluye pasos claros para para limpiar un lavamanos							NA	NA	2	NA	NA
	7.14	El protocolo para la instalación incluye pasos claros para para limpiar los fluidos corporales							NA	NA	2	NA	NA
	TOTAL										28	0	0	28
	FORMULARIO No. 8 ESTANDAR DE AGUA CALIENTE, RESIDUAL Y PLUVIAL (ACRP)
	NO.	CRITERIO						EME	SP	SC	EME	SP	SC
	8.1	Planos actualizados de instalaciones para ACRP							NA	NA	0.5	NA	NA
	8.2	Se dispone de agua fría y caliente .						NA			NA	0.5	0.5
	8.3	El sistema de agua caliente está funcionando entre 35-45 grados celcius.						NA			NA	0.5	0.5
	8.4	Las tuberías y accesorios de ACRP se encuentran en buen estado							NA	NA	0.2	NA	NA
	8.5	El sistema de drenajes de las aguas CRP está separado							NA	NA	0.2	NA	NA
	8.6	Las descargas de las aguas residuales y pluviales están señalizadas							NA	NA	0.2	NA	NA
	8.7	Existe planta de tratamiento en funcionamiento de las aguas residuales del establecimiento de salud, previo a su descarga.							NA	NA	0.5	NA	NA
	8.8	Existe estudio técnico en relación con las aguas residuales, aprobado por la autoridad sanitaria o ambiental.							NA	NA	0.5	NA	NA
	8.9	Personal capacitado para manejo de aguas residuales							NA	NA	0.2	NA	NA
	8.10	Equipo básico (botas, guantes, mascarillas) para manejo de aguas residual							NA	NA	0.2	NA	NA
	8.11	El personal que maneja de aguas residuales con esquema de vacunación completo y vigente (Tétanos y Hepatitis B).							NA	NA	0.5	NA	NA
	TOTAL										3	1	1	5
	Ponderación de los criterios:
	No.	Estándar					Criterios	EME	SP	RN
	1	Agua					9	22	12	12
	2	Sanitarios					5	9	8	8
	3	Higiene					14	4	40	40
	4	Esterilización					7	3	13	13
	5	Residuos					11	20	20	20
	6	Limpieza					9	11	6	6
	7	Administración					14	28	0	0
	8	Agua CRP					11	3	1	1
	Total						80	100	100	100
	Puntuación para la clasificación de la certificación de los establecimientos de salud
	CERTIFICACION						PUNTUACION
	Certificación "Plata"						70- 79
	Certificación "Oro"						80-89
	Certificación "Diamante"						90-100

## Sheet: Supplement 1-ScoreCard-English
	Date				/ /
	Interviewer's Name
	Interviewer Position
	Department
	Municipality
	Type of servic				CAP ( ) CAIMI ( ) Hospital ( )
	Personnel interviewed
	No.	NAME						POSITION			WARD REPORTING ON
	1
	2
	3
	4
	FORM No. 1 WATER STANDARDS
	NO.	CRITERIO						EME	SP	SC	EME	SP	SC
	1.1	The health facility has an improved water source							NA		5	NA
	1.2	The water source is located in the health facility							NA		1	NA
	1.3	The water system is working at the time of the visit							NA		8	NA
	1.4	The water source is permanent							NA		2	NA
	1.5	Is the water drinkable							NA		3	NA
	1.6	Drinking water is stored safely							NA		2	NA
	1.7	The establishment has a working power plant							NA		1	NA
	1.8	The delivery rooms and the newborn have water available for various uses						NA			NA	7	7
	1.9	The delivery rooms and the newborn have drinking water						NA			NA	5	5
	TOTAL										22	12	12	46
	FORM No. 2 SANITATION STANDARDS
	NO.	CRITERIO						EME	SP	SC	EME	SP	SC
	2.1	The room has an improved toilet and works									1	3	3
	2.2	The toilets are separated and marked for men / women							NA	NA	1	NA	NA
	2.3	The toilet is accessible to people with mobility problems and special abilities							NA		2	NA	2
	2.4	The toilets are clean							NA		2	NA	2
	2.5	The toilets provide privacy							NA		1	NA	2
	TOTAL										7	3	9	19
	FORM No. 3 HYGIENE STANDARDS
	NO.	CRITERIO						EME	SP	SC	EME	SP	SC
	3.1	The beds have washable material covers									1	1	1
	3.2	Each bed has a maximum of one patient (or mother and child)									2.5	1.5	1.5
	3.3	Separation of the beds by a distance of 2.5 meters from the center of one bed to the other									0.5	0.5	0.5
	3.4	Environment for bathroom (shower) available in the room						NA			NA	3	3
	3.5	The bathroom environment (shower) has water available						NA			NA	3	3
	3.6	The bathroom (shower) environment is in condition for immediate and unobstructed use						NA			NA	1	1
	3.7	The bathroom environment (shower) has drainage to the chair						NA			NA	2	2
	3.8	The bathroom area includes doors, partitions or screens so that the patient has privacy						NA			NA	1	1
	3.9	The sinks have water.						NA			NA	8	8
	3.1	Sinks with liquid soap (or alcohol-based disinfectant).						NA			NA	8	8
	3.11	Sinks with disposable paper for drying.						NA			NA	8	8
	3.12	The bathroom (shower) environment has a door 80 cm wide and space for a companion to provide assistance if necessary.						NA			NA	2	2
	3.13	The path to the shower is accessible for people with limited mobility and special abilities						NA			NA	1	1
	TOTAL										4	40	40	84
	FORM No. 4 EQUIPMENT STERILIZATION STANDARDS
	NO.	CRITERIO						EME	SP	SC	EME	SP	SC
	4.1	Sterile scissors are available in the room						NA			NA	5	2
	4.2	Sterile clamps / castile tapes are available in the room						NA			NA	5	2
	4.3	Sterile gloves available in the room									2	2	2
	4.4	Sterile gauges available in the room						NA			NA	2	2
	4.5	Autoclave in good condition and operation in central equipment						3	NA	NA	3	NA	NA
	4.6	The sterilized mask available in the room						NA			NA	2	2
	4.7	The sterilized clinical gown available in the room						NA			NA	2	2
	TOTAL										5	18	12	35
	FORM No. 5 WASTE MANAGEMENT STANDARDS
	NO.	CRITERIO						EME	SP	SC	EME	SP	SC
	5.1	Waste is segregated in three bags (red, white and black) with specifications according to regulations									2	3	2
	5.2	The containers are clearly labeled to observe the type of waste receptacle									2	2	2
	5.3	There is a rigid red container used for sharps waste									2	3	2
	5.4	The placentas are properly arranged in red bags.						NA			NA	2	2
	5.5	Diapers with baby feces are deposited in the red bags						NA	NA		NA	NA	2
	5.6	Gloves (according to regulations) are available when handling and transporting solid hospital waste.									2	2	2
	5.7	Masks (according to regulations) are available for when handling and transporting solid hospital waste.									2	2	2
	5.8	Glasses available for when handling and transporting solid hospital waste.									2	2	2
	5.9	Rubber boots available for handling and transporting solid hospital waste.									2	2	2
	5.1	The use of protective equipment is used by personnel handling solid hospital wastes.									2	2	2
	5.11	Waste is transported and stored safely and correctly separately to the collection center of the health establishment.							NA	NA	4	NA	NA
	TOTAL										20	20	20	60
	FORM No. 6 ENVIRONMENTAL CLEANING STANDARDS
	NO.	CRITERIO						EME	SP	SC	EME	SP	SC
	6.1	The room has a written cleaning schedule that is updated and used clearly.									1	1	1
	6.2	The room has a written summary of the duties and responsibilities of cleaning staff									1	1	1
	6.3	Work surfaces and beds are visibly clean									2	2	1
	6.4	The chlorine solution available for use in the installation (0.5mg / lt)									2	2	1
	6.5	Clean mops are available							NA		1	NA	0.5
	6.6	Detergent is available							NA		1	NA	0.5
	6.7	0.5% chlorine solution is used in the room							NA		1	NA	0.5
	6.8	Brooms in good condition is available							NA		1	NA	0.5
	6.9	There are washing machines available and enough to wash each patient's bedding.							NA	NA	1	NA	NA
	TOTAL										11	6	6	23
	FORM No. 7 ADMINISTRATION AND DOCUMENTATION STANDARDS
	NO.	CRITERIO						EME	SP	RN	EME	SP	RN
	7.1	The cleaning staff has received at least 2 training on cleaning procedures in the last 12 months.							NA	NA	2	NA	NA
	7.2	The delivery room staff has received training on cleaning procedures in the last 12 months							NA	NA	2	NA	NA
	7.3	In general rooms, signs that remember hygiene measures are placed.							NA	NA	2	NA	NA
	7.4	The establishment has an annual improvement plan that is implemented all the time.							NA	NA	2	NA	NA
	7.5	There is an updated protocol / procedure guide describing the procedure used for drinking water							NA	NA	2	NA	NA
	7.6	There is a risk management plan to guarantee water management and management							NA	NA	2	NA	NA
	7.7	There is a risk management plan to guarantee sanitation services							NA	NA	2	NA	NA
	7.8	There are and apply protocols / guidelines for procedures for handling, safe handling and food safety							NA	NA	2	NA	NA
	7.9	There is a protocol that clearly describes a program for the disposal and treatment of hospital solid waste							NA	NA	2	NA	NA
	7.1	There are protocols / guidelines for cleaning procedures and they clearly describe the procedures as indicated in the guide for the prevention and control of in-hospital infections of the Vice Ministry of Hospitals.							NA	NA	2	NA	NA
	7.11	The impieza protocol includes clear steps to clean a bed and cot (if applicable)							NA	NA	2	NA	NA
	7.12	The installation protocol includes clear steps to clean a floor							NA	NA	2	NA	NA
	7.13	The installation protocol includes clear steps to clean a sink							NA	NA	2	NA	NA
	7.14	The protocol for installation includes clear steps to clean body fluids							NA	NA	2	NA	NA
	TOTAL										28	0	0	28
	FORMULARIO No. 8 HOT WATER, WASTEWATER, AND STORMWATER
	NO.	CRITERIO						EME	SP	SC	EME	SP	SC
	8.1	Updated facilities plans for ACRP							NA	NA	0.5	NA	NA
	8.2	Hot and cold water is available.						NA			NA	0.5	0.5
	8.3	The hot water system is operating between 35-45 degrees celcius.						NA			NA	0.5	0.5
	8.4	ACRP pipes and fittings are in good condition							NA	NA	0.2	NA	NA
	8.5	The CRP water drainage system is separate							NA	NA	0.2	NA	NA
	8.6	Wastewater and stormwater discharges are marked							NA	NA	0.2	NA	NA
	8.7	There is a treatment plant in operation of the wastewater of the health facility, prior to its discharge.							NA	NA	0.5	NA	NA
	8.8	There is a technical study in relation to wastewater, approved by the sanitary or environmental authority.							NA	NA	0.5	NA	NA
	8.9	Trained personnel for wastewater management							NA	NA	0.2	NA	NA
	8.1	Basic equipment (boots, gloves, masks) for wastewater management							NA	NA	0.2	NA	NA
	8.11	Personnel that manage wastewater with a complete and current vaccination schedule (Tetanus and Hepatitis B).							NA	NA	0.5	NA	NA
	TOTAL										3	1	1	5
	Points by Criteria
	No.	Estándar					Criterios	EME	SP	RN
	1	Water					9	22	12	12
	2	Sanitation					5	9	8	8
	3	Hygiene					14	4	40	40
	4	Sterilization					7	3	13	13
	5	Wate Management					11	20	20	20
	6	Cleanining					9	11	6	6
	7	Administration					14	28	0	0
	8	W					11	3	1	1
	Total						80	100	100	100
	Points for clean clinic certifications
	CERTIFICACION						PUNTUACION
	"Silver" Certification						70-79
	"Gold" Certification						80-89
	"Diamond" certification						90-100
